# Supplementary material for: A vector database solution for rational design of CRISPR defense-avoidant phage therapy
Source: PeerJ journal article supplement (doi:10.7717/peerj-cs.3427), 2025-12-16
Supplement: vdphage.zip [file Cas_REPORT.xls]

############################################
CP076401 ( Clostridioides difficile strain S-0253 chromosome, complete genome ) 
--------------------------------------------
### System: CAS-TypeIB (UserReplicon_CAS-TypeIB_1)
#SequenceID	Cas-type/subtype	Gene status	System	Type	Begin	End	Strand	Other_information
CP076401.1_1965	cas2_TypeI-II-III	accessory	CAS	CDS	2254686	2254976	-	ID=1_1965;partial=00;start_type=ATG;rbs_motif=None;rbs_spacer=None;gc_cont=0.216;conf=99.23;score=21.16;cscore=33.45;sscore=-12.29;rscore=-13.07;uscore=-0.84;tscore=2.28;
CP076401.1_1966	cas1_TypeIB	mandatory	CAS-TypeIB	CDS	2255187	2256185	-	ID=1_1966;partial=00;start_type=TTG;rbs_motif=AGGAGG;rbs_spacer=5-10bp;gc_cont=0.245;conf=100.00;score=131.48;cscore=119.90;sscore=11.58;rscore=12.98;uscore=3.74;tscore=-6.05;
CP076401.1_1967	cas4_TypeI-II	accessory	CAS	CDS	2256220	2256714	-	ID=1_1967;partial=00;start_type=ATG;rbs_motif=GGA/GAG/AGG;rbs_spacer=5-10bp;gc_cont=0.240;conf=100.00;score=80.62;cscore=77.02;sscore=3.61;rscore=-1.12;uscore=3.10;tscore=2.28;
CP076401.1_1968	cas3_TypeI	accessory	CAS	CDS	2259990	2262548	-	ID=1_1968;partial=00;start_type=ATG;rbs_motif=AGGAG;rbs_spacer=5-10bp;gc_cont=0.224;conf=99.99;score=430.62;cscore=411.11;sscore=19.50;rscore=11.27;uscore=4.93;tscore=2.28;
CP076401.1_1969	cas5b2_TypeIB	mandatory	CAS-TypeIB	CDS	2262572	2263312	-	ID=1_1969;partial=00;start_type=ATG;rbs_motif=GGAG/GAGG;rbs_spacer=5-10bp;gc_cont=0.259;conf=100.00;score=116.50;cscore=100.50;sscore=16.00;rscore=8.35;uscore=4.11;tscore=2.28;
CP076401.1_1970	cas7b3_TypeIB	mandatory	CAS-TypeIB	CDS	2263314	2264303	-	ID=1_1970;partial=00;start_type=ATG;rbs_motif=AGGAG;rbs_spacer=5-10bp;gc_cont=0.271;conf=99.99;score=216.50;cscore=199.04;sscore=17.46;rscore=11.27;uscore=2.67;tscore=2.28;
CP076401.1_1972	cas6_TypeI-III	accessory	CAS	CDS	2266047	2266742	-	ID=1_1972;partial=00;start_type=TTG;rbs_motif=AGGAGG;rbs_spacer=5-10bp;gc_cont=0.233;conf=100.00;score=110.26;cscore=102.92;sscore=7.35;rscore=12.98;uscore=1.07;tscore=-6.05;
####Summary system CAS-TypeIB:begin=2254686;end=2266742:{sequenceID=CP076401} : [cas2_TypeI-II-III (2254686,2254976,-); cas1_TypeIB (2255187,2256185,-); cas4_TypeI-II (2256220,2256714,-); cas3_TypeI (2259990,2262548,-); cas5b2_TypeIB (2262572,2263312,-); cas7b3_TypeIB (2263314,2264303,-); cas6_TypeI-III (2266047,2266742,-)]

### System: CAS-TypeIB (UserReplicon_CAS-TypeIB_2)
#SequenceID	Cas-type/subtype	Gene status	System	Type	Begin	End	Strand	Other_information
CP076401.1_2299	cas3_TypeI	accessory	CAS	CDS	2618963	2621371	-	ID=1_2299;partial=00;start_type=ATG;rbs_motif=GGA/GAG/AGG;rbs_spacer=5-10bp;gc_cont=0.252;conf=99.99;score=372.77;cscore=370.55;sscore=2.22;rscore=-1.12;uscore=0.07;tscore=2.28;
CP076401.1_2300	cas5b_TypeIB	mandatory	CAS-TypeIB	CDS	2621398	2622195	-	ID=1_2300;partial=00;start_type=ATG;rbs_motif=AGGAGG;rbs_spacer=11-12bp;gc_cont=0.268;conf=100.00;score=156.25;cscore=135.75;sscore=20.50;rscore=11.97;uscore=5.14;tscore=2.28;
CP076401.1_2301	cas7b_TypeIB	mandatory	CAS-TypeIB	CDS	2622211	2623224	-	ID=1_2301;partial=00;start_type=ATG;rbs_motif=AGxAGG/AGGxGG;rbs_spacer=5-10bp;gc_cont=0.286;conf=99.99;score=218.91;cscore=200.64;sscore=18.27;rscore=9.74;uscore=5.18;tscore=2.28;
CP076401.1_2303	cas6_TypeI-III	accessory	CAS	CDS	2624724	2625461	-	ID=1_2303;partial=00;start_type=ATG;rbs_motif=AGGAGG;rbs_spacer=5-10bp;gc_cont=0.248;conf=100.00;score=121.31;cscore=100.87;sscore=20.44;rscore=12.98;uscore=5.84;tscore=2.28;
####Summary system CAS-TypeIB:begin=2618963;end=2625461:{sequenceID=CP076401} : [cas3_TypeI (2618963,2621371,-); cas5b_TypeIB (2621398,2622195,-); cas7b_TypeIB (2622211,2623224,-); cas6_TypeI-III (2624724,2625461,-)]
