# Supplementary material for: A vector database solution for rational design of CRISPR defense-avoidant phage therapy
Source: PeerJ journal article supplement (doi:10.7717/peerj-cs.3427), 2025-12-16
Supplement: vdphage.zip [file Cas_REPORT.xls]

############################################
CP076402 ( Clostridioides difficile strain S-0253 plasmid unnamed, complete sequence ) 
--------------------------------------------
