# Supplementary material for: A vector database solution for rational design of CRISPR defense-avoidant phage therapy
Source: PeerJ journal article supplement (doi:10.7717/peerj-cs.3427), 2025-12-16
Supplement: vdphage.zip [file CRISPR-Cas_summary.xls]

Sequence(s)	CRISPR array(s)	Nb CRISPRs	Evidence-levels	Cas cluster(s)	Nb Cas	Cas Types/Subtypes
CP076401	CP076401_1[17819;17903] (evidence-level=1), CP076401_2[146556;146634] (evidence-level=1), CP076401_3[1022564;1022641] (evidence-level=1), CP076401_4[1138411;1138518] (evidence-level=1), CP076401_5[1494521;1495007] (evidence-level=4), CP076401_6[1605236;1605462] (evidence-level=1), CP076401_7[1780848;1781208] (evidence-level=4), CP076401_8[2256799;2259800] (evidence-level=4), CP076401_9[2456180;2456995] (evidence-level=4), CP076401_10[2700076;2700633] (evidence-level=4), CP076401_11[2935312;2935637] (evidence-level=2), CP076401_12[2990217;2990392] (evidence-level=1), CP076401_13[2990499;2990788] (evidence-level=2), CP076401_14[2990991;2991081] (evidence-level=1),	14	Nb_arrays_evidence-level_1=7,Nb_arrays_evidence-level_2=2,Nb_arrays_evidence-level_3=0,Nb_arrays_evidence-level_4=5	CAS-TypeIB[2254686;2266742], CAS-TypeIB[2618963;2625461],	2	CAS-TypeIB (n=2), 
