# Supplementary material for: A vector database solution for rational design of CRISPR defense-avoidant phage therapy
Source: PeerJ journal article supplement (doi:10.7717/peerj-cs.3427), 2025-12-16
Supplement: vdphage.zip [file CRISPR-Cas_summary.xls]

Sequence(s)	CRISPR array(s)	Nb CRISPRs	Evidence-levels	Cas cluster(s)	Nb Cas	Cas Types/Subtypes
CP076402	CP076402_1[1699;1807] (evidence-level=1),	1	Nb_arrays_evidence-level_1=1,Nb_arrays_evidence-level_2=0,Nb_arrays_evidence-level_3=0,Nb_arrays_evidence-level_4=0		0
