# Supplementary material for: A vector database solution for rational design of CRISPR defense-avoidant phage therapy
Source: PeerJ journal article supplement (doi:10.7717/peerj-cs.3427), 2025-12-16
Supplement: vdphage.zip [file Crisprs_REPORT.xls]

Strain	Sequence	Sequence_basename	Duplicated_Spacers	CRISPR_Id	CRISPR_Start	CRISPR_End	CRISPR_Length	Potential_Orientation (AT%)	CRISPRDirection	Consensus_Repeat	Repeat_ID (CRISPRdb)	Nb_CRISPRs_with_same_Repeat (CRISPRdb)	Repeat_Length	Spacers_Nb	Mean_size_Spacers	Standard_Deviation_Spacers	Nb_Repeats_matching_Consensus	Ratio_Repeats_match/TotalRepeat	Conservation_Repeats (% identity)	EBcons_Repeats	Conservation_Spacers (% identity)	EBcons_Spacers	Repeat_Length_plus_mean_size_Spacers	Ratio_Repeat/mean_Spacers_Length	CRISPR_found_in_DB (if sequence IDs are similar)	Evidence_Level
Clostridioides difficile strain S-0253 chromosome, complete genome	CP076401.1	CP076401	0	CP076401_1	17819	17903	84	Unknown	Unknown	TGTGTGTTAGCACTTTAAGCAAC	Unknown	0	23	1	39	0	1	0.5	95.6521739130435	95.6521739130435	100	100	62	0.58974358974359	0	1
Clostridioides difficile strain S-0253 chromosome, complete genome	CP076401.1	CP076401	0	CP076401_2	146556	146634	78	Forward	R [0,0.37 Confidence: MEDIUM]	TGTTTATAATGTGGATAATATTTAA	R8333	15	25	1	29	0	1	0.5	92	92	100	100	54	0.862068965517241	0	1
Clostridioides difficile strain S-0253 chromosome, complete genome	CP076401.1	CP076401	0	CP076401_3	1022564	1022641	77	Forward	Unknown	AAAAAATAAGAAAGTTTATAAATA	Unknown	0	24	1	30	0	1	0.5	87.5	87.5	100	100	54	0.8	0	1
Clostridioides difficile strain S-0253 chromosome, complete genome	CP076401.1	CP076401	0	CP076401_4	1138411	1138518	107	Reverse	Unknown	ATATATAATAAAATAAGTAAACTAAG	Unknown	0	26	1	56	0	1	0.5	96.1538461538462	96.1538461538462	100	100	82	0.464285714285714	0	1
Clostridioides difficile strain S-0253 chromosome, complete genome	CP076401.1	CP076401	0	CP076401_5	1494521	1495007	486	Reverse	F [0.5,0.37 Confidence: LOW]	GTTTTATATTAACTAAGTGGTATGTAAAT	R7354	19	29	7	36.4285714285714	0.534522483824849	5	0.625	65.5172413793103	80.3332478853259	2.17391304347826	0	65.4285714285714	0.796078431372549	0	4
Clostridioides difficile strain S-0253 chromosome, complete genome	CP076401.1	CP076401	0	CP076401_6	1605236	1605462	226	Reverse	R [0,0.37 Confidence: MEDIUM]	GTTTTATATTAACTATATGGAATGTAAAT	R7356	19	29	3	37	1	3	0.75	89.6551724137931	91.607467678009	20.5128205128205	21.460053365179	66	0.783783783783784	0	1
Clostridioides difficile strain S-0253 chromosome, complete genome	CP076401.1	CP076401	0	CP076401_7	1780848	1781208	360	Reverse	F [0.5,0.37 Confidence: LOW]	GTTTTATATTAACTAAGTGGTATGTAAAT	R7354	19	29	5	37.4	0.547722557505166	2	0.333333333333333	82.7586206896552	85.7931301159056	7.84313725490196	16.3946796800388	66.4	0.775401069518717	0	4
Clostridioides difficile strain S-0253 chromosome, complete genome	CP076401.1	CP076401	0	CP076401_8	2256799	2259800	3001	Forward	R [0,0.37 Confidence: MEDIUM]	ATTTAAATACATCTCATGTTACTGTTTAAC	R1384	2	30	45	36.0444444444444	0.562282505651399	45	0.978260869565217	93.3333333333333	98.9926868632192	0	0	66.0444444444445	0.832305795314427	0	4
Clostridioides difficile strain S-0253 chromosome, complete genome	CP076401.1	CP076401	0	CP076401_9	2456180	2456995	815	Unknown	F [0.37,0 Confidence: MEDIUM]	ATTTACATTCCATATAGTTAATCTAAAAC	R1411	9	29	12	36.5833333333333	0.90033663737852	12	0.923076923076923	86.2068965517241	94.6035370533896	0	0	65.5833333333333	0.792710706150342	0	4
Clostridioides difficile strain S-0253 chromosome, complete genome	CP076401.1	CP076401	0	CP076401_10	2700076	2700633	557	Forward	F [0.37,0 Confidence: MEDIUM]	ATTTACATTCCATATAGTTAATATAAAAC	R1410	9	29	8	37.125	0.353553390593274	9	1	100	100	0	0	66.125	0.781144781144781	0	4
Clostridioides difficile strain S-0253 chromosome, complete genome	CP076401.1	CP076401	0	CP076401_11	2935312	2935637	325	Unknown	R [0,0.37 Confidence: MEDIUM]	TTACCATCTATTTGTTGCCATCCTGT	R8377	15	26	5	34	0	1	0.166666666666667	42.3076923076923	46.7855039953551	20.5882352941176	23.0047836591145	60	0.764705882352941	0	2
Clostridioides difficile strain S-0253 chromosome, complete genome	CP076401.1	CP076401	0	CP076401_12	2990217	2990392	175	Unknown	Unknown	TTTCTTTTACAGCTTCTAAACATAT	Unknown	0	25	2	50	12.7279220613579	0	0	64	64.2746833073717	45.7627118644068	61.0169491525424	75	0.5	0	1
Clostridioides difficile strain S-0253 chromosome, complete genome	CP076401.1	CP076401	0	CP076401_13	2990499	2990788	289	Unknown	Unknown	TTTCTTTTACAGCTTCTAAACATAT	Unknown	0	25	4	41	0	1	0.2	60	59.3502462166209	34.1463414634146	33.2734298965174	66	0.609756097560976	0	2
Clostridioides difficile strain S-0253 chromosome, complete genome	CP076401.1	CP076401	0	CP076401_14	2990991	2991081	90	Forward	Unknown	TTTCTTTTACAGCTTCTAAACATAT	Unknown	0	25	1	41	0	0	0	88	88	100	100	66	0.609756097560976	0	1
