# Supplementary material for: A vector database solution for rational design of CRISPR defense-avoidant phage therapy
Source: PeerJ journal article supplement (doi:10.7717/peerj-cs.3427), 2025-12-16
Supplement: vdphage.zip [file Crisprs_REPORT.xls]

Strain	Sequence	Sequence_basename	Duplicated_Spacers	CRISPR_Id	CRISPR_Start	CRISPR_End	CRISPR_Length	Potential_Orientation (AT%)	CRISPRDirection	Consensus_Repeat	Repeat_ID (CRISPRdb)	Nb_CRISPRs_with_same_Repeat (CRISPRdb)	Repeat_Length	Spacers_Nb	Mean_size_Spacers	Standard_Deviation_Spacers	Nb_Repeats_matching_Consensus	Ratio_Repeats_match/TotalRepeat	Conservation_Repeats (% identity)	EBcons_Repeats	Conservation_Spacers (% identity)	EBcons_Spacers	Repeat_Length_plus_mean_size_Spacers	Ratio_Repeat/mean_Spacers_Length	CRISPR_found_in_DB (if sequence IDs are similar)	Evidence_Level
Clostridioides difficile strain S-0253 plasmid unnamed, complete sequence	CP076402.1	CP076402	0	CP076402_1	1699	1807	108	Reverse	Unknown	TAAAAATTTCTTTTGGTAAAATAATTGTAC	Unknown	0	30	1	49	0	2	1	100	100	100	100	79	0.612244897959184	0	1
